# Supplementary material for: Selection of chromatographic separation conditions for reliable monitoring of the transformation of AgNPs/Ag(i) species by HPLC-ICP-MS in surface water and green algae cells
Source: Royal Society of Chemistry journal article supplement (doi:10.1039/d3ja00213f), 2023-01-01
Supplement: d3ja00213f1.pdf [file d3ja00213f1.pdf]

**Supplementary Materials for:**  
**Selection of chromatographic separation conditions for reliable monitoring of  
transformation of AgNPs/Ag(I) species by HPLC-ICP-MS in surface water and green  
algae cells**

Julita Malejko, Weronika Liszewska, Beata Godlewska-Żyłkiewicz\*

Department of Analytical and Inorganic Chemistry, Faculty of Chemistry, University of  
Białystok, K. Ciołkowskiego 1K, 15-245 Białystok, Poland

**Table 1S.** The biosorption and uptake of Ag(I) and AgNPs by *Acutodesmus obliquus* determined by ICP-MS method

|            | Added mass of Ag, $\mu\text{g}$ | Mass of Ag in algae, $\mu\text{g}$ | Biosorption, % | Average biosorption, % | Dry mass of algae, g | Uptake, $\mu\text{g/g}$ | Average uptake, $\mu\text{g/g}$ |
|------------|---------------------------------|------------------------------------|----------------|------------------------|----------------------|-------------------------|---------------------------------|
| Ag(I)      | 2.5353                          | 2.1407                             | 84.4           | 82.3                   | 0.0145               | 147.3                   | 143.0                           |
|            | 2.5353                          | 2.0311                             | 80.1           |                        | 0.0146               | 138.7                   |                                 |
| 10nm AgNPs | 2.4840                          | 1.9521                             | 78.6           | 77.2                   | 0.0147               | 132.9                   | 131.2                           |
|            | 2.4820                          | 1.8811                             | 75.8           |                        | 0.0145               | 129.6                   |                                 |
| 30nm AgNPs | 2.5903                          | 2.1798                             | 84.2           | 82.7                   | 0.0146               | 149.7                   | 143.8                           |
|            | 2.4056                          | 1.9557                             | 81.3           |                        | 0.0142               | 137.8                   |                                 |

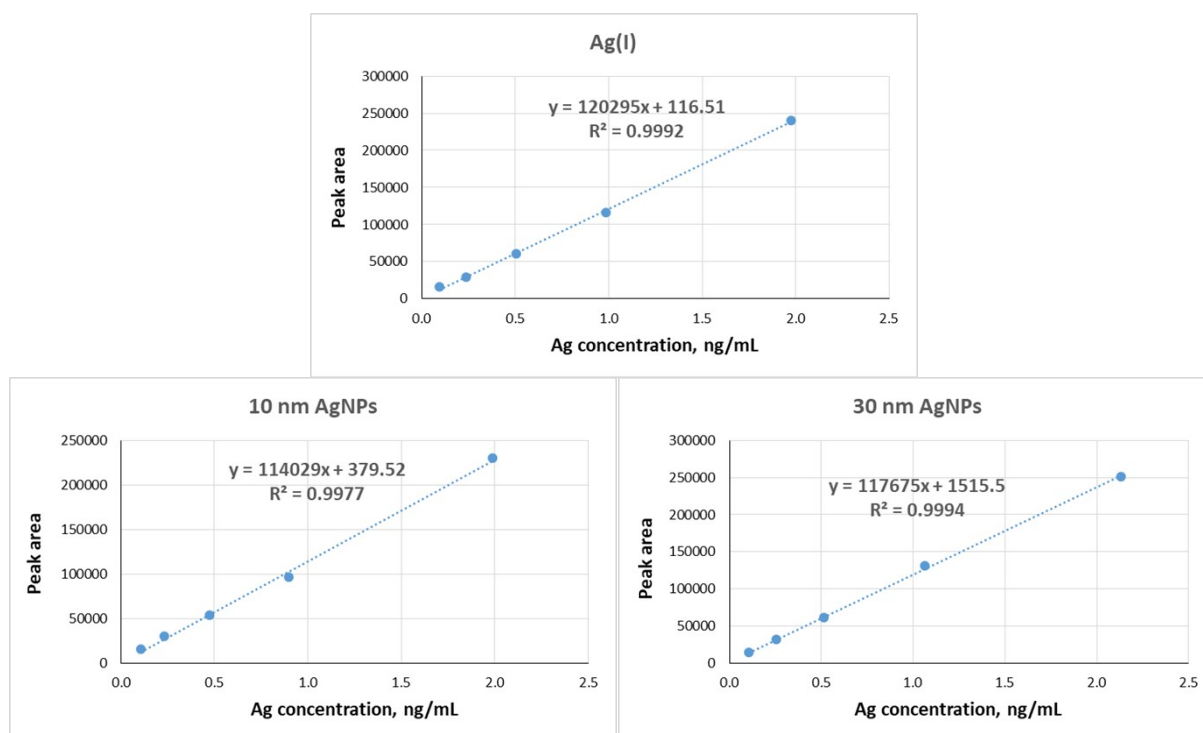

**Figure 1S.** Calibration graphs for Ag(I) and AgNPs determination by HPLC-ICP-MS method (column: Nucleosil C18 (250×4.6 mm, 7  $\mu\text{m}$  particle size, 1000  $\text{\AA}$  pore size), mobile phase: 10 mM SDS, 2 mM citrate buffer, 2 mM tiopronin, flow rate: 0.5 mL/min, injection volume: 50  $\mu\text{L}$ )
